# Supplementary material for: P2Y12 Antiplatelet Choice for Patients with Chronic Kidney Disease and Acute Coronary Syndrome: A Systematic Review and Meta-Analysis
Source: PubMed Central journal article supplement (PMC8004167; doi:10.3390/jpm11030222), 2021-03-21

Table S1. Quality assessment of randomized controlled trials

|                           | Random sequence generation | Allocation concealment | Blinding of participants and personnel | Blinding outcome assessment | Incomplete outcome data | Selective reporting | Other bias |
|---------------------------|----------------------------|------------------------|----------------------------------------|-----------------------------|-------------------------|---------------------|------------|
| James et al. (2010) [22]  | L                          | L                      | L                                      | L                           | U                       | L                   | L          |
| Jeong et al. (2015) [26]  | L                          | L                      | L                                      | U                           | U                       | L                   | U          |
| Kim et al. (2017) [27]    | L                          | L                      | H                                      | U                           | U                       | L                   | U          |
| Liang et al. (2015) [24]  | U                          | H                      | H                                      | U                           | U                       | U                   | L          |
| Melloni et al. (2015) [7] | L                          | L                      | L                                      | L                           | L                       | L                   | L          |
| Park et al. (2009) [28]   | U                          | H                      | H                                      | H                           | U                       | L                   | U          |
| Woo et al. (2011) [29]    | L                          | H                      | H                                      | H                           | U                       | L                   | L          |

Table S2. Quality assessment of non-randomized controlled trials

|                           | Selection of participants | Confounding variables | Measurement of intervention | Blinding for outcome assessment | Incomplete outcome data | Selective outcome reporting |
|---------------------------|---------------------------|-----------------------|-----------------------------|---------------------------------|-------------------------|-----------------------------|
| Barber et al. (2017) [19] | L                         | L                     | L                           | H                               | U                       | L                           |
| Choi et al. (2012) [20]   | L                         | U                     | L                           | H                               | L                       | L                           |
| Edfors et al. (2018) [21] | L                         | L                     |                             | H                               | U                       | L                           |
| Kim et al. (2012) [23]    | L                         | L                     | L                           | H                               | U                       | U                           |
| Nish et al. (2017) [25]   | H                         | U                     | U                           | H                               | U                       | L                           |

Figure S1. Funnel plots of (a) all-cause mortality; and (b) major bleeding

(a)

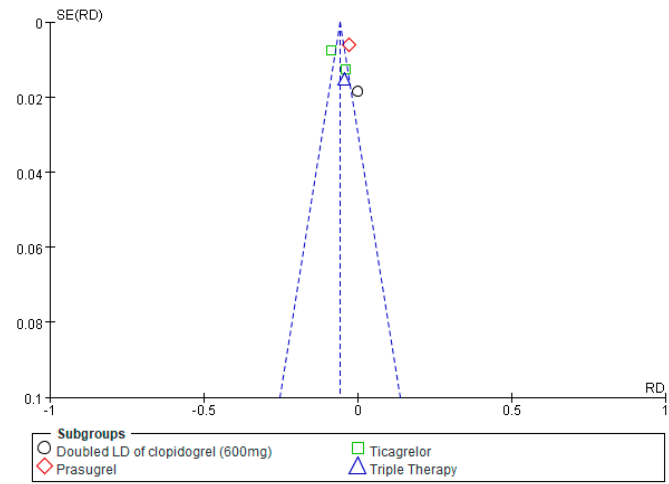

(b)

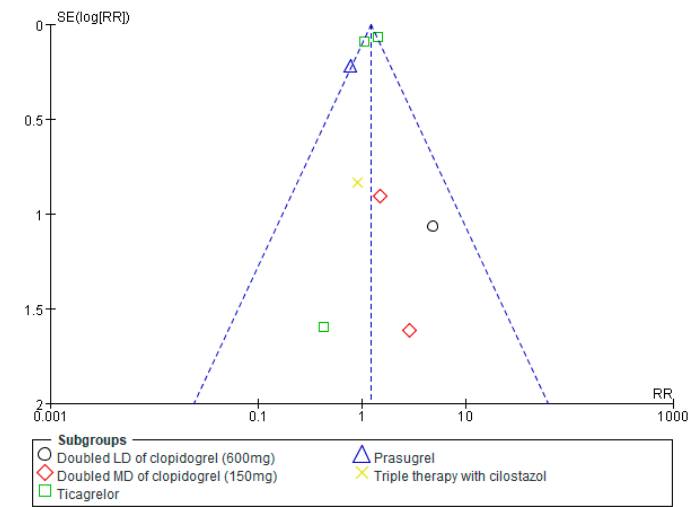

Supplement: jpm-11-00222-s001.pdf [file jpm-11-00222-s001.pdf]
